# Supplementary material for: Search Engine for Antimicrobial Resistance: A Cloud Compatible Pipeline and Web Interface for Rapidly Detecting Antimicrobial Resistance Genes Directly from Sequence Data
Source: PubMed Central journal article supplement (PMC4510569; doi:10.1371/journal.pone.0133492), 2015-07-21
Supplement: pone.0133492.s001.pdf [file pone.0133492.s001.pdf]

# 1 Supplemental methods

## 2 A. Reference databases

3 SEAR has the option of removing contamination by subtracting reads using the BWA  
4 index for the human genome (HG19 build, [1]), this is not supplied in the SEAR  
5 package to reduce file size but can be downloaded (<https://genome.ucsc.edu/>).  
6 SEAR requires a reference database for the read-clustering step, the default supplied  
7 is the ARGannot database [2] but other options are available (such as CARD [3]) and  
8 the user can supply any multiFASTA file as a database. The supplied ARGannot  
9 database was customized as follows: ARGannot ARGs were clustered at 97%  
10 identity using USEARCH [4] and the representative sequence for each cluster was  
11 added to the pipeline's ARG database. Each cluster and representative sequence is  
12 annotated with gene type and the class of antimicrobial to which the gene confers  
13 resistance. The *Shigella* reference database for the benchmarking test was made by  
14 downloading the FASTA files for each ARG tested (n=19) in the *Holt et al.* study,  
15 removing duplicate entries and creating a multiFASTA file (n=16).

## 16 B. SEAR pipeline

17 **Dependencies:** SEAR is available as both a command-line and web-based  
18 application and a full list of scripts, reference databases, external software and  
19 modules are listed in Supplemental Table S1. SEAR is distributed with a SEAR\_bin  
20 directory that contains all the required dependencies that must be installed on the  
21 system. The USEARCH package [4] is used for FASTQ quality checking, conversion  
22 to FASTA format and clustering. Due to the memory restrictions with the free  
23 distribution of USEARCH, the input files are split into smaller, temporary files and  
24 piped into USEARCH fastq\_filter and subsequently into USEARCH usearch\_global.

25 In the local alignment step, SEAR uses the supplied commandline BLAST package  
26 [5] and requires an internet connection. Currently, SEAR uses remote blast to NCBI  
27 databases and uses cURL [6] to create up to date, local databases for other online  
28 resources during every SEAR run, but local databases could be installed and used.  
29 **Running:** SEAR can be run via the website interface or in a single command line  
30 script. Adjustable parameters and the default settings are listed in Supplemental  
31 Table S2. When using the website, files are checked and uploaded to the server  
32 using the SEAR CGI script, which subsequently launches the command line script  
33 using the supplied files and parameters.

### 34 **C. Relative abundance calculation**

35 The proportion of mapped bases relative to the length of each reference sequence is  
36 calculated and the total number of successfully mapped reads is retrieved to allow for  
37 ARG annotation and calculation of relative abundance. When calculating relative  
38 abundance, the total number (n) of ARGs that have been annotated are used to  
39 calculate a relative abundance (RA) percentage for each ARG. Firstly, an abundance

40 value (A) is calculated for each gene according to:  $A = \frac{X}{Y} \cdot \frac{1}{L}$ , where X denotes the  
41 number of reads that successfully mapped, Y denotes the total number of reads in  
42 the input file/s and L denotes the length of the reference gene (in bases). Relative

43 abundance is then calculated using:  $RA = \left( \frac{A}{\sum_{i=1}^n} \right) * 100$

44 In this way, the relative abundance measure describes the proportion of sequence  
45 reads that have built the consensus sequence of each annotated ARG from a single  
46 pipeline run.

## 47 **D. Metagenome sample collection**

48 Samples were collected from two faecal sources within the River Cam Catchment,  
49 Cambridge, UK on the 21<sup>st</sup> June 2012. The waste effluent of the University of  
50 Cambridge dairy farm (latitude: 52.22259, longitude: 0.02603) was sampled prior to it  
51 being applied to the surrounding fields as fertiliser. The effluent of the municipal  
52 wastewater treatment works (WWTW) (latitude: 52.234469, longitude: 0.154614) was  
53 collected from the effluent discharge pipe that enters the River Cam. Samples were  
54 collected in 10L sterile polypropylene containers. Sample volumes were based on the  
55 microbial abundances, as previously determined for these sites using a DNA  
56 extraction series (data not shown). Samples were transported at 4°C to the  
57 laboratory and processed within 2 hours.

## 58 **E. Sample filtration, metagenomic DNA extraction and** 59 **sequencing**

60 Samples were vacuum pre-filtered through 3.0 µm membranes (Millipore) to remove  
61 debris and eukaryotic cells before being filtered at 2 Bar through 0.22 µm  
62 membranes (Millipore) to capture the prokaryotic cells. Metagenomic DNA was  
63 extracted by vortexing membranes in phosphate buffered saline with Tween20 (2%)  
64 before enzymatic lysis (Meta-G-Nome DNA isolation kit; Epicentre). Assessment of  
65 DNA quality and concentration was made by TBE agarose (2%) gel electrophoresis  
66 and spectrophotometry (Nanodrop ND-1000; ThermoScientific). For each sample, 2  
67 µg of DNA was sequenced by the Eastern Sequence and Informatics Hub,  
68 Cambridge, UK. Seventy-five base pair paired-end libraries were prepared from the  
69 samples and were sequenced using an Illumina HiSeq2000.

## 70 **F. NGS datasets**

71 **Environmental:** The FASTQ files for the WWTW and Farm effluent metagenomes  
72 are available via the European Nucleotide Archive (ENA) (study: ERP003955).  
73 Sample accession numbers are as follows: farm effluent (ERS786322), WWTW  
74 effluent (ERS781558).

75 **Human Microbiome Project (HMP):** The FASTQ files for 32 microbiomes from  
76 Spanish patients were downloaded from the HMP via the ENA website (study:  
77 PRJEB1220) (accessed: 02.03.2015) [7].

78 ***Shigella sonnei*:** A global whole-genome-sequencing dataset of 126 clinical isolates  
79 of *Shigella sonnei* (an enteric pathogen) [8] was used to test the utility of the pipeline  
80 for identifying ARGs in clinical isolates. The FASTQ files for the 126 isolates were  
81 downloaded from the Sanger FTP site (study: PRJEB2128) (accessed: 02.03.2015).

82

## 83 **G. Supplemental References**

- 84 1. Consortium GR. hg19. In: Consortium GR, editor. UCSC2009.
- 85 2. Gupta SK, Padmanabhan BR, Diene SM, Lopez-Rojas R, Kempf M, Landraud  
86 L, et al. ARG-ANNOT, a New Bioinformatic Tool To Discover Antibiotic Resistance  
87 Genes in Bacterial Genomes. *Antimicrob Agents Chemother.* 2014;58(1):212-20. doi:  
88 10.1128/aac.01310-13.
- 89 3. McArthur AG, Waglechner N, Nizam F, Yan A, Azad MA, Baylay AJ, et al. The  
90 comprehensive antibiotic resistance database. *Antimicrob Agents Chemother.*  
91 2013;57(7):3348-57. Epub 2013/05/08. doi: 10.1128/AAC.00419-13. PubMed PMID:  
92 23650175; PubMed Central PMCID: PMC3697360.

- 93 4. Edgar RC. Search and clustering orders of magnitude faster than BLAST.  
94 Bioinformatics. 2010;26(19):2460-1. Epub 2010/08/17. doi:  
95 10.1093/bioinformatics/btq461. PubMed PMID: 20709691.
- 96 5. Altschul SF, Gish W, Miller W, Myers EW, Lipman DJ. Basic local alignment  
97 search tool. Journal of Molecular Biology. 1990;215(3):403-10. doi:  
98 [http://dx.doi.org/10.1016/S0022-2836\(05\)80360-2](http://dx.doi.org/10.1016/S0022-2836(05)80360-2).
- 99 6. Stenberg D. cURL. 1996.
- 100 7. HMP. Structure, function and diversity of the healthy human microbiome.  
101 Nature. 2012;486(7402):207-14. Epub 2012/06/16. doi: 10.1038/nature11234.  
102 PubMed PMID: 22699609; PubMed Central PMCID: PMC3564958.
- 103 8. Holt KE, Baker S, Weill FX, Holmes EC, Kitchen A, Yu J, et al. Shigella sonnei  
104 genome sequencing and phylogenetic analysis indicate recent global dissemination  
105 from Europe. Nat Genet. 2012;44(9):1056-9. Epub 2012/08/07. doi:  
106 10.1038/ng.2369. PubMed PMID: 22863732; PubMed Central PMCID:  
107 PMC3442231.
- 108
