# Supplementary material for: Search Engine for Antimicrobial Resistance: A Cloud Compatible Pipeline and Web Interface for Rapidly Detecting Antimicrobial Resistance Genes Directly from Sequence Data
Source: PubMed Central journal article supplement (PMC4510569; doi:10.1371/journal.pone.0133492), 2015-07-21
Supplement: pone.0133492.s002.pdf [file pone.0133492.s002.pdf]

**S1 Table. A list of dependencies required by SEAR.** Both command-line and web-based versions of SEAR require several SEAR scripts and external software and modules, as well as one or more reference databases.

| <b>Dependency</b> | <b>Notes</b>                                                                                                 |
|-------------------|--------------------------------------------------------------------------------------------------------------|
| perl              | required modules: Getopt::Long, Pod::Usage, Time::HiRes, File::Basename, File::Find, List::Util, LWP::Simple |
| r                 |                                                                                                              |
| usearch           |                                                                                                              |
| bwa               |                                                                                                              |
| tophat            | incl. bam2fastx                                                                                              |
| samtools          | incl. bcftools and vcfutils.pl                                                                               |
| ncbi blast        |                                                                                                              |
| seqtk             |                                                                                                              |
