# Supplementary material for: Search Engine for Antimicrobial Resistance: A Cloud Compatible Pipeline and Web Interface for Rapidly Detecting Antimicrobial Resistance Genes Directly from Sequence Data
Source: PubMed Central journal article supplement (PMC4510569; doi:10.1371/journal.pone.0133492), 2015-07-21
Supplement: pone.0133492.s003.pdf [file pone.0133492.s003.pdf]

**S2 Table. SEAR parameters.**

| <b>Paramater</b>                  | <b>Default</b>        | <b>Explanation</b>                                                                                                                                                                                             |
|-----------------------------------|-----------------------|----------------------------------------------------------------------------------------------------------------------------------------------------------------------------------------------------------------|
| <i>--infile</i><br>(-i)           | -                     | Paths to input file(s) (files must be .fastq/.fq although can be gzipped e.g. file.fastq.gz).                                                                                                                  |
| <i>--fqformat</i><br>(-ff)        | 33                    | ASCII offset for the input fastq files. Accepts either 33 or 64.                                                                                                                                               |
| <i>--lengthcutoff</i><br>(-lc)    | 70                    | Discard sequences with length < lc.                                                                                                                                                                            |
| <i>--qualitycutoff</i><br>(-qc)   | 20                    | Quality score cutoff for input fastq files.                                                                                                                                                                    |
| <i>--filter</i><br>(-f)           | N                     | Filter reads by mapping to Human Genome reference and discarding mapped reads. Accepts either Y or N.                                                                                                          |
| <i>--coveragecutoff</i><br>(-cc)  | 90%                   | The coverage cut-off parameter dictates what proportion of the reference sequence must be covered by reads for a successful annotation. In this way, the annotation stringency is controlled and customisable. |
| <i>--clusteringident</i><br>(-ci) | 0.99                  | Identity value for usearch clustering.                                                                                                                                                                         |
| <i>--references</i><br>(-r)       | arg_annot_database.fa | The reference gene dataset to use.                                                                                                                                                                             |
| <i>--threads</i><br>(-t)          | 1                     | The number of threads to use in steps that allow multi-threading .                                                                                                                                             |
| <i>--help</i><br>(-h)             | -                     | Prints usage and exits.                                                                                                                                                                                        |
| <i>--manual</i><br>(-m)           | -                     | Prints the manual page and exits.                                                                                                                                                                              |
