# Supplementary material for: Search Engine for Antimicrobial Resistance: A Cloud Compatible Pipeline and Web Interface for Rapidly Detecting Antimicrobial Resistance Genes Directly from Sequence Data
Source: PubMed Central journal article supplement (PMC4510569; doi:10.1371/journal.pone.0133492), 2015-07-21
Supplement: pone.0133492.s004.pdf [file pone.0133492.s004.pdf]

**S3 Table. NGS datasets.** List of all NGS datasets used.

| <b>Name</b>   | <b>ID</b> | <b>Source</b> |
|---------------|-----------|---------------|
| Farm effluent | ERS786322 | ENA           |
| WWTW effluent | ERS781558 | ENA           |
| O2.UC1-0      | ERR209529 | ENA           |
| O2.UC4-0      | ERR209614 | ENA           |
| O2.UC11-0     | ERR209531 | ENA           |
| O2.UC12-0     | ERR209534 | ENA           |
| O2.UC13-0     | ERR209538 | ENA           |
| O2.UC16-0     | ERR209544 | ENA           |
| O2.UC17-0     | ERR209547 | ENA           |
| O2.UC18-0     | ERR209550 | ENA           |
| O2.UC19-0     | ERR209554 | ENA           |
| O2.UC21-0     | ERR209564 | ENA           |
| O2.UC22-0     | ERR209567 | ENA           |
| O2.UC23-0     | ERR209572 | ENA           |
| O2.UC24-0     | ERR209576 | ENA           |
| V1.CD2-0      | ERR209704 | ENA           |
| V1.CD3-0      | ERR209723 | ENA           |
| V1.CD6-0      | ERR209743 | ENA           |
| V1.CD8-0      | ERR209750 | ENA           |
| V1.CD9-0      | ERR209752 | ENA           |
| V1.CD11-0     | ERR209682 | ENA           |
| V1.CD12-0     | ERR209684 | ENA           |
| V1.CD13-0     | ERR209686 | ENA           |
| V1.CD14-0     | ERR209688 | ENA           |
| V1.UC7-0      | ERR209901 | ENA           |
| V1.UC8-0      | ERR209903 | ENA           |
| V1.UC9-0      | ERR209905 | ENA           |
| V1.UC10-0     | ERR209754 | ENA           |
| V1.UC13-0     | ERR209766 | ENA           |
| V1.UC14-0     | ERR209770 | ENA           |
| V1.UC15-0     | ERR209774 | ENA           |
| V1.UC17-0     | ERR209780 | ENA           |
| V1.UC19-0     | ERR209786 | ENA           |
| V1.UC21-0     | ERR209789 | ENA           |
| Sh41191       | ERR024604 | ENA           |
| Sh66470       | ERR024605 | ENA           |
| Sh74369       | ERR024606 | ENA           |
| Sh55623       | ERR024607 | ENA           |
| Sh60108       | ERR024608 | ENA           |
| Sh62542       | ERR024609 | ENA           |
| Sh65179       | ERR024610 | ENA           |
| Sh65387       | ERR024611 | ENA           |

|           |           |     |
|-----------|-----------|-----|
| Sh65623   | ERR024612 | ENA |
| ShIB1     | ERR024616 | ENA |
| ShIB690   | ERR024617 | ENA |
| ShIB691   | ERR024618 | ENA |
| ShIB694   | ERR024619 | ENA |
| ShIB2     | ERR024620 | ENA |
| ShIB3     | ERR024621 | ENA |
| ShIB10    | ERR024622 | ENA |
| ShIB681   | ERR024625 | ENA |
| ShIB683   | ERR024626 | ENA |
| ShIB687   | ERR024627 | ENA |
| ShIB695   | ERR025682 | ENA |
| ShIB1970  | ERR025683 | ENA |
| ShIB1976  | ERR025684 | ENA |
| ShIB1980  | ERR025685 | ENA |
| ShIB696   | ERR025686 | ENA |
| ShIB697   | ERR025687 | ENA |
| ShIB698   | ERR025688 | ENA |
| ShIB713   | ERR025689 | ENA |
| ShIB716   | ERR025690 | ENA |
| ShIB717   | ERR025691 | ENA |
| ShIB739   | ERR025692 | ENA |
| ShIB748   | ERR025693 | ENA |
| ShIB1985  | ERR025695 | ENA |
| ShIB2009  | ERR025696 | ENA |
| ShIB2012  | ERR025697 | ENA |
| ShIB2013  | ERR025698 | ENA |
| ShIB1987  | ERR025699 | ENA |
| ShIB1990  | ERR025700 | ENA |
| ShIB1993  | ERR025701 | ENA |
| ShIB1995  | ERR025702 | ENA |
| ShIB1997  | ERR025703 | ENA |
| ShIB2000  | ERR025704 | ENA |
| ShIB2004  | ERR025705 | ENA |
| ShIB2008  | ERR025706 | ENA |
| ShIB2015  | ERR025708 | ENA |
| ShIB3488  | ERR025709 | ENA |
| ShIB3507  | ERR025710 | ENA |
| ShIB3580  | ERR025711 | ENA |
| ShIB2018  | ERR025712 | ENA |
| ShIB2024  | ERR025713 | ENA |
| ShIB2026  | ERR025714 | ENA |
| ShIB2493  | ERR025715 | ENA |
| ShIB48279 | ERR025716 | ENA |
| ShIB3277  | ERR025717 | ENA |

|           |           |     |
|-----------|-----------|-----|
| ShIB3300  | ERR025718 | ENA |
| ShIB3374  | ERR025719 | ENA |
| ShIB3599  | ERR025721 | ENA |
| Sh54213   | ERR025722 | ENA |
| Sh54228   | ERR025724 | ENA |
| PWR105    | ERR025725 | ENA |
| Sh54178   | ERR025726 | ENA |
| Sh54179   | ERR025727 | ENA |
| Sh54184   | ERR025729 | ENA |
| Sh54185   | ERR025730 | ENA |
| Sh54190   | ERR025731 | ENA |
| Sh54210   | ERR025732 | ENA |
| Sh658     | ERR025734 | ENA |
| Sh1267    | ERR025735 | ENA |
| Sh1567    | ERR025736 | ENA |
| Sh259     | ERR025737 | ENA |
| Sh1460    | ERR025738 | ENA |
| Sh1461    | ERR025739 | ENA |
| Sh1263    | ERR025741 | ENA |
| Sh1265    | ERR025742 | ENA |
| Sh1166    | ERR025743 | ENA |
| Sh1167    | ERR025744 | ENA |
| Sh1173    | ERR025746 | ENA |
| Sh8883    | ERR025747 | ENA |
| Sh970044  | ERR025748 | ENA |
| Sh2073    | ERR025749 | ENA |
| Sh273     | ERR025750 | ENA |
| Sh373     | ERR025751 | ENA |
| Sh1274    | ERR025752 | ENA |
| Sh2574    | ERR025753 | ENA |
| Sh4374    | ERR025754 | ENA |
| Sh4474    | ERR025755 | ENA |
| Sh476     | ERR025756 | ENA |
| Sh988743  | ERR025758 | ENA |
| Sh36224   | ERR025759 | ENA |
| Sh989560  | ERR025761 | ENA |
| Sh9810267 | ERR025762 | ENA |
| Sh998911  | ERR025763 | ENA |
| Sh2225    | ERR025764 | ENA |
| Sh5827    | ERR025765 | ENA |
| Sh31382   | ERR025767 | ENA |
| Sh32222   | ERR025768 | ENA |
| 20051272  | ERR028671 | ENA |
| 20061758  | ERR028672 | ENA |
| 19911483  | ERR028673 | ENA |

|          |           |     |
|----------|-----------|-----|
| 19920319 | ERR028674 | ENA |
| 19910761 | ERR028675 | ENA |
| 20041367 | ERR028676 | ENA |
| 20060018 | ERR028677 | ENA |
| 20081885 | ERR028678 | ENA |
| 20040880 | ERR028679 | ENA |
| CS2      | ERR028680 | ENA |
| 20051541 | ERR028681 | ENA |
| 20061309 | ERR028684 | ENA |
| CS20     | ERR028685 | ENA |
| CS6      | ERR028686 | ENA |
| CS14     | ERR028687 | ENA |
| 20003593 | ERR028688 | ENA |
| 20021122 | ERR028689 | ENA |
| 20031275 | ERR028690 | ENA |
| 19984123 | ERR028691 | ENA |
| 20040489 | ERR028692 | ENA |
| 20052631 | ERR028693 | ENA |
| 19904011 | ERR028694 | ENA |
| 20011685 | ERR028695 | ENA |
| 20040924 | ERR028697 | ENA |
| 20062087 | ERR028699 | ENA |
| 20071599 | ERR028700 | ENA |
| 20010007 | ERR028702 | ENA |
| 20062313 | ERR028703 | ENA |
| CS7      | ERR028704 | ENA |
| CS8      | ERR028705 | ENA |
| CS1      | ERR028706 | ENA |
