# Supplementary material for: Search Engine for Antimicrobial Resistance: A Cloud Compatible Pipeline and Web Interface for Rapidly Detecting Antimicrobial Resistance Genes Directly from Sequence Data
Source: PubMed Central journal article supplement (PMC4510569; doi:10.1371/journal.pone.0133492), 2015-07-21
Supplement: pone.0133492.s005.pdf [file pone.0133492.s005.pdf]

**S4 Table. Example runtimes for SEAR.** This table lists example runtimes for SEAR when using default server settings.

| <b>Name</b>   | <b>ID</b> | <b>Type</b>              | <b>File size (MB)</b> | <b>Time (minutes)</b> |
|---------------|-----------|--------------------------|-----------------------|-----------------------|
| ShIB1976      | ERR025684 | Clinical isolate         | 434                   | 6.1                   |
| O2.UC1-0      | ERR209529 | HMP metagenome           | 3200                  | 36                    |
| WWTW effluent | ERS781558 | Environmental metagenome | 14000                 | 194                   |
