# Supplementary material for: Search Engine for Antimicrobial Resistance: A Cloud Compatible Pipeline and Web Interface for Rapidly Detecting Antimicrobial Resistance Genes Directly from Sequence Data
Source: PubMed Central journal article supplement (PMC4510569; doi:10.1371/journal.pone.0133492), 2015-07-21
Supplement: pone.0133492.s006.pdf [file pone.0133492.s006.pdf]

**S5 Table. SEAR ARG detection for HMP sequence data.**

| <b>Name</b> | <b>Sample ID</b> | <b>Gene</b>                            |
|-------------|------------------|----------------------------------------|
| V1.UC9-0    | ERR209905        | (AGly)Aph3-III:V01547:535-1329:795     |
| V1.UC9-0    | ERR209905        | (Tet)TetW:AJ222769:3687-5606:1920      |
| V1.UC9-0    | ERR209905        | (Bla)cfxA5:AY769934:28-993:966         |
| V1.UC9-0    | ERR209905        | (MLS)ErmF:M14730:241-1041:801          |
| V1.UC9-0    | ERR209905        | (MLS)ErmB:M11180:714-1451:738          |
| V1.UC9-0    | ERR209905        | (Tet)TetO:M18896:207-2126:1920         |
| V1.UC9-0    | ERR209905        | (Tet)TetX:M37699:586-1752:1167         |
| V1.UC9-0    | ERR209905        | (MLS)ErmG:M15332:672-1406:735          |
| V1.UC9-0    | ERR209905        | (AGly)StrB:FJ474091:264-1100:837       |
| V1.UC8-0    | ERR209903        | (Bla)cfxA5:AY769934:28-993:966         |
| V1.UC8-0    | ERR209903        | (Tet)TetW:AJ222769:3687-5606:1920      |
| V1.UC8-0    | ERR209903        | (Tet)TetQ:Z21523:362-2287:1926         |
| V1.UC8-0    | ERR209903        | (MLS)ErmG:M15332:672-1406:735          |
| V1.UC8-0    | ERR209903        | (MLS)LnuC:AY928180:1150-1644:495       |
| V1.UC8-0    | ERR209903        | (Tet)TetO:M18896:207-2126:1920         |
| V1.UC8-0    | ERR209903        | (MLS)ErmB:M11180:714-1451:738          |
| V1.UC8-0    | ERR209903        | (Tet)Tet-32:DQ647324:181-2100:1920     |
| V1.UC8-0    | ERR209903        | (AGly)Aph3-III:V01547:535-1329:795     |
| V1.UC8-0    | ERR209903        | (MLS)ErmF:M14730:241-1041:801          |
| V1.UC8-0    | ERR209903        | (Tet)TetX:M37699:586-1752:1167         |
| V1.UC8-0    | ERR209903        | (AGly)Sat4A:X92945:38870-39412:543     |
| V1.UC7-0    | ERR209901        | (Bla)cfxA6:GQ342996:798-1793:966       |
| V1.UC7-0    | ERR209901        | (Bla)cfxA5:AY769934:28-993:966         |
| V1.UC7-0    | ERR209901        | (Tet)TetW:AJ222769:3687-5606:1920      |
| V1.UC7-0    | ERR209901        | (Tet)TetO:M18896:207-2126:1920         |
| V1.UC10-0   | ERR209754        | (Tet)TetW:AJ222769:3687-5606:1920      |
| V1.UC10-0   | ERR209754        | (AGly)Aph3-III:V01547:535-1329:795     |
| V1.UC10-0   | ERR209754        | (MLS)ErmG:M15332:672-1406:735          |
| V1.UC10-0   | ERR209754        | (MLS)ErmF:M14730:241-1041:801          |
| V1.UC10-0   | ERR209754        | (Tet)TetQ:Z21523:362-2287:1926         |
| V1.UC10-0   | ERR209754        | (MLS)ErmB:M11180:714-1451:738          |
| V1.UC10-0   | ERR209754        | (Tet)TetO:M18896:207-2126:1920         |
| V1.UC10-0   | ERR209754        | (AGly)Sat4A:X92945:38870-39412:543     |
| V1.UC10-0   | ERR209754        | (Tet)Tet-44:FN594949:25245-27167:1923  |
| V1.UC10-0   | ERR209754        | (Tet)TetX:M37699:586-1752:1167         |
| V1.UC10-0   | ERR209754        | (AGly)Ant6-lb:FN594949:27482-28339:858 |
| V1.UC10-0   | ERR209754        | (Bla)cfxA5:AY769934:28-993:966         |
| V1.UC13-0   | ERR209766        | (AGly)Aph3-III:V01547:535-1329:795     |
| V1.UC13-0   | ERR209766        | (Tet)TetW:AJ222769:3687-5606:1920      |
| V1.UC13-0   | ERR209766        | (Tet)TetQ:Z21523:362-2287:1926         |
| V1.UC13-0   | ERR209766        | (MLS)ErmB:M11180:714-1451:738          |

|           |           |                                       |
|-----------|-----------|---------------------------------------|
| V1.UC13-0 | ERR209766 | (MLS)ErmF:M14730:241-1041:801         |
| V1.UC13-0 | ERR209766 | (Tet)TetX:M37699:586-1752:1167        |
| V1.UC13-0 | ERR209766 | (AGly)Sat4A:X92945:38870-39412:543    |
| V1.UC13-0 | ERR209766 | (Bla)cfxA5:AY769934:28-993:966        |
| V1.UC13-0 | ERR209766 | (MLS)ErmG:M15332:672-1406:735         |
| V1.UC13-0 | ERR209766 | (Sul)SulII:EU360945:1617-2432:816     |
| V1.UC13-0 | ERR209766 | (AGly)Ant6-Ia:AF330699:22-930:909     |
| V1.UC13-0 | ERR209766 | (Tet)TetO:M18896:207-2126:1920        |
| V1.UC13-0 | ERR209766 | (Tet)Tet-32:DQ647324:181-2100:1920    |
| V1.UC14-0 | ERR209770 | (Bla)cfxA5:AY769934:28-993:966        |
| V1.UC14-0 | ERR209770 | (Tet)TetW:AJ222769:3687-5606:1920     |
| V1.UC14-0 | ERR209770 | (Tet)TetQ:Z21523:362-2287:1926        |
| V1.UC14-0 | ERR209770 | (MLS)ErmG:M15332:672-1406:735         |
| V1.UC14-0 | ERR209770 | (Tet)TetO:M18896:207-2126:1920        |
| V1.UC14-0 | ERR209770 | (AGly)Aph3-III:V01547:535-1329:795    |
| V1.UC14-0 | ERR209770 | (MLS)ErmB:M11180:714-1451:738         |
| V1.UC14-0 | ERR209770 | (AGly)Sat4A:X92945:38870-39412:543    |
| V1.UC14-0 | ERR209770 | (Tet)Tet-32:DQ647324:181-2100:1920    |
| V1.UC14-0 | ERR209770 | (MLS)ErmF:M14730:241-1041:801         |
| V1.UC14-0 | ERR209770 | (Tet)TetX:M37699:586-1752:1167        |
| V1.UC15-0 | ERR209774 | (Tet)TetW:AJ222769:3687-5606:1920     |
| V1.UC15-0 | ERR209774 | (AGly)Aph3-III:V01547:535-1329:795    |
| V1.UC15-0 | ERR209774 | (Tet)TetO:M18896:207-2126:1920        |
| V1.UC15-0 | ERR209774 | (Tet)TetQ:Z21523:362-2287:1926        |
| V1.UC15-0 | ERR209774 | (MLS)ErmF:M14730:241-1041:801         |
| V1.UC15-0 | ERR209774 | (Tet)TetX:M37699:586-1752:1167        |
| V1.UC15-0 | ERR209774 | (MLS)ErmB:M11180:714-1451:738         |
| V1.UC15-0 | ERR209774 | (Bla)cfxA5:AY769934:28-993:966        |
| V1.UC15-0 | ERR209774 | (Bla)CEPA-29:FR688019:1-903:903       |
| V1.UC15-0 | ERR209774 | (Tet)Tet-40:AM419751:14211-15431:1221 |
| V1.UC15-0 | ERR209774 | (AGly)Sat4A:X92945:38870-39412:543    |
| V1.UC15-0 | ERR209774 | (AGly)Aac6-Aph2:M13771:304-1743:1440  |
| V1.UC17-0 | ERR209780 | (MLS)ErmB:M11180:714-1451:738         |
| V1.UC17-0 | ERR209780 | (Tet)TetX:M37699:586-1752:1167        |
| V1.UC17-0 | ERR209780 | (Bla)cfxA5:AY769934:28-993:966        |
| V1.UC17-0 | ERR209780 | (Tet)TetQ:Z21523:362-2287:1926        |
| V1.UC17-0 | ERR209780 | (MLS)LnuC:AY928180:1150-1644:495      |
| V1.UC17-0 | ERR209780 | (Tet)TetW:AJ222769:3687-5606:1920     |
| V1.UC17-0 | ERR209780 | (MLS)ErmF:M14730:241-1041:801         |
| V1.UC17-0 | ERR209780 | (AGly)Aph3-III:V01547:535-1329:795    |
| V1.UC17-0 | ERR209780 | (Bla)cfxA6:GQ342996:798-1793:966      |
| V1.UC17-0 | ERR209780 | (Tet)TetO:M18896:207-2126:1920        |
| V1.UC17-0 | ERR209780 | (Tet)TetM:U08812:1981-3900:1920       |
| V1.UC19-0 | ERR209786 | (Tet)TetW:AJ222769:3687-5606:1920     |

|           |           |                                       |
|-----------|-----------|---------------------------------------|
| V1.UC19-0 | ERR209786 | (MLS)LnuC:AY928180:1150-1644:495      |
| V1.UC19-0 | ERR209786 | (Tet)TetO:M18896:207-2126:1920        |
| V1.UC19-0 | ERR209786 | (MLS)ErmB:M11180:714-1451:738         |
| V1.UC19-0 | ERR209786 | (Tet)Tet-32:DQ647324:181-2100:1920    |
| V1.UC19-0 | ERR209786 | (AGly)Aph3-III:V01547:535-1329:795    |
| V1.UC19-0 | ERR209786 | (Tet)TetX:M37699:586-1752:1167        |
| V1.UC19-0 | ERR209786 | (Bla)cfxA5:AY769934:28-993:966        |
| V1.UC19-0 | ERR209786 | (AGly)Sat4A:X92945:38870-39412:543    |
| V1.UC21-0 | ERR209789 | (Bla)cfxA5:AY769934:28-993:966        |
| V1.UC21-0 | ERR209789 | (MLS)ErmB:M11180:714-1451:738         |
| V1.UC21-0 | ERR209789 | (Tet)TetX:M37699:586-1752:1167        |
| V1.UC21-0 | ERR209789 | (Tet)TetW:AJ222769:3687-5606:1920     |
| V1.UC21-0 | ERR209789 | (MLS)ErmF:M14730:241-1041:801         |
| V1.UC21-0 | ERR209789 | (Tet)TetQ:Z21523:362-2287:1926        |
| V1.UC21-0 | ERR209789 | (MLS)MsrD:AF274302:2462-3925:1464     |
| V1.UC21-0 | ERR209789 | (AGly)Aph3-III:V01547:535-1329:795    |
| O2.UC1-0  | ERR209529 | (Bla)cfxA6:GQ342996:798-1793:966      |
| O2.UC1-0  | ERR209529 | (MLS)ErmG:M15332:672-1406:735         |
| O2.UC1-0  | ERR209529 | (Bla)cfxA5:AY769934:28-993:966        |
| O2.UC1-0  | ERR209529 | (Tet)TetX:M37699:586-1752:1167        |
| O2.UC1-0  | ERR209529 | (MLS)ErmF:M14730:241-1041:801         |
| O2.UC1-0  | ERR209529 | (Tet)TetW:AJ222769:3687-5606:1920     |
| O2.UC1-0  | ERR209529 | (Tet)TetO:M18896:207-2126:1920        |
| O2.UC1-0  | ERR209529 | (MLS)ErmB:M11180:714-1451:738         |
| O2.UC1-0  | ERR209529 | (AGly)Aph3-III:V01547:535-1329:795    |
| O2.UC1-0  | ERR209529 | (AGly)Sat4A:X92945:38870-39412:543    |
| O2.UC1-0  | ERR209529 | (Tet)Tet-40:AM419751:14211-15431:1221 |
| O2.UC4-0  | ERR209614 | (Tet)TetW:AJ222769:3687-5606:1920     |
| O2.UC4-0  | ERR209614 | (Tet)TetQ:Z21523:362-2287:1926        |
| O2.UC4-0  | ERR209614 | (MLS)ErmF:M14730:241-1041:801         |
| O2.UC4-0  | ERR209614 | (MLS)ErmB:M11180:714-1451:738         |
| O2.UC4-0  | ERR209614 | (Tet)TetX:M37699:586-1752:1167        |
| O2.UC4-0  | ERR209614 | (AGly)Aph3-III:V01547:535-1329:795    |
| O2.UC4-0  | ERR209614 | (Tet)TetO:M18896:207-2126:1920        |
| O2.UC4-0  | ERR209614 | (Tet)Tet-32:DQ647324:181-2100:1920    |
| O2.UC4-0  | ERR209614 | (MLS)ErmG:M15332:672-1406:735         |
| O2.UC11-0 | ERR209531 | (MLS)ErmB:M11180:714-1451:738         |
| O2.UC11-0 | ERR209531 | (MLS)ErmG:M15332:672-1406:735         |
| O2.UC11-0 | ERR209531 | (Tet)TetW:AJ222769:3687-5606:1920     |
| O2.UC11-0 | ERR209531 | (AGly)Aph3-III:V01547:535-1329:795    |
| O2.UC11-0 | ERR209531 | (MLS)ErmF:M14730:241-1041:801         |
| O2.UC11-0 | ERR209531 | (Tet)TetX:M37699:586-1752:1167        |
| O2.UC11-0 | ERR209531 | (Bla)cfxA5:AY769934:28-993:966        |
| O2.UC11-0 | ERR209531 | (AGly)Sat4A:X92945:38870-39412:543    |

|           |           |                                       |
|-----------|-----------|---------------------------------------|
| O2.UC11-0 | ERR209531 | (AGly)Ant6-Ia:AF330699:22-930:909     |
| O2.UC11-0 | ERR209531 | (Tet)Tet-40:AM419751:14211-15431:1221 |
| O2.UC12-0 | ERR209534 | (MLS)ErmB:M11180:714-1451:738         |
| O2.UC12-0 | ERR209534 | (Tet)TetW:AJ222769:3687-5606:1920     |
| O2.UC12-0 | ERR209534 | (AGly)Aph3-III:V01547:535-1329:795    |
| O2.UC12-0 | ERR209534 | (MLS)ErmF:M14730:241-1041:801         |
| O2.UC12-0 | ERR209534 | (Bla)cfxA5:AY769934:28-993:966        |
| O2.UC12-0 | ERR209534 | (Tet)TetX:M37699:586-1752:1167        |
| O2.UC12-0 | ERR209534 | (Tet)TetO:M18896:207-2126:1920        |
| O2.UC12-0 | ERR209534 | (Tet)TetQ:Z21523:362-2287:1926        |
| O2.UC12-0 | ERR209534 | (Bla)ACI1:AJ007350:240-1094:855       |
| O2.UC12-0 | ERR209534 | (Bla)cfxA6:GQ342996:798-1793:966      |
| O2.UC12-0 | ERR209534 | (MLS)ErmG:M15332:672-1406:735         |
| O2.UC12-0 | ERR209534 | (AGly)Sat4A:X92945:38870-39412:543    |
| O2.UC13-0 | ERR209538 | (Tet)TetW:AJ222769:3687-5606:1920     |
| O2.UC13-0 | ERR209538 | (MLS)ErmG:M15332:672-1406:735         |
| O2.UC13-0 | ERR209538 | (Tet)TetO:M18896:207-2126:1920        |
| O2.UC13-0 | ERR209538 | (MLS)ErmF:M14730:241-1041:801         |
| O2.UC13-0 | ERR209538 | (MLS)ErmB:M11180:714-1451:738         |
| O2.UC13-0 | ERR209538 | (Tet)Tet-32:DQ647324:181-2100:1920    |
| O2.UC13-0 | ERR209538 | (Tet)TetX:M37699:586-1752:1167        |
| O2.UC13-0 | ERR209538 | (AGly)Aph3-III:V01547:535-1329:795    |
| O2.UC16-0 | ERR209544 | (Bla)cfxA6:GQ342996:798-1793:966      |
| O2.UC16-0 | ERR209544 | (Tet)TetX:M37699:586-1752:1167        |
| O2.UC16-0 | ERR209544 | (MLS)ErmF:M14730:241-1041:801         |
| O2.UC16-0 | ERR209544 | (Bla)cfxA5:AY769934:28-993:966        |
| O2.UC16-0 | ERR209544 | (MLS)ErmG:M15332:672-1406:735         |
| O2.UC16-0 | ERR209544 | (Tet)TetW:AJ222769:3687-5606:1920     |
| O2.UC16-0 | ERR209544 | (MLS)ErmB:M11180:714-1451:738         |
| O2.UC17-0 | ERR209547 | (Bla)cfxA6:GQ342996:798-1793:966      |
| O2.UC17-0 | ERR209547 | (Tet)TetQ:Z21523:362-2287:1926        |
| O2.UC17-0 | ERR209547 | (Bla)cfxA5:AY769934:28-993:966        |
| O2.UC17-0 | ERR209547 | (Tet)TetW:AJ222769:3687-5606:1920     |
| O2.UC17-0 | ERR209547 | (AGly)Sat4A:X92945:38870-39412:543    |
| O2.UC17-0 | ERR209547 | (AGly)Ant6-Ia:AF330699:22-930:909     |
| O2.UC17-0 | ERR209547 | (AGly)Aph3-III:V01547:535-1329:795    |
| O2.UC17-0 | ERR209547 | (MLS)ErmG:M15332:672-1406:735         |
| O2.UC17-0 | ERR209547 | (Tet)TetX:M37699:586-1752:1167        |
| O2.UC17-0 | ERR209547 | (MLS)ErmF:M14730:241-1041:801         |
| O2.UC17-0 | ERR209547 | (MLS)ErmB:M11180:714-1451:738         |
| O2.UC18-0 | ERR209550 | (Bla)cfxA5:AY769934:28-993:966        |
| O2.UC18-0 | ERR209550 | (Tet)TetW:AJ222769:3687-5606:1920     |
| O2.UC18-0 | ERR209550 | (MLS)ErmF:M14730:241-1041:801         |
| O2.UC18-0 | ERR209550 | (Tet)TetX:M37699:586-1752:1167        |

|           |           |                                       |
|-----------|-----------|---------------------------------------|
| O2.UC18-0 | ERR209550 | (MLS)ErmG:M15332:672-1406:735         |
| O2.UC18-0 | ERR209550 | (Tet)Tet-32:DQ647324:181-2100:1920    |
| O2.UC19-0 | ERR209554 | (AGly)Aph3-III:V01547:535-1329:795    |
| O2.UC19-0 | ERR209554 | (MLS)ErmF:M14730:241-1041:801         |
| O2.UC19-0 | ERR209554 | (Tet)TetX:M37699:586-1752:1167        |
| O2.UC19-0 | ERR209554 | (Tet)TetQ:Z21523:362-2287:1926        |
| O2.UC19-0 | ERR209554 | (AGly)Sat4A:X92945:38870-39412:543    |
| O2.UC19-0 | ERR209554 | (AGly)Ant6-Ia:AF330699:22-930:909     |
| O2.UC19-0 | ERR209554 | (Sul)SulIII:EU360945:1617-2432:816    |
| O2.UC19-0 | ERR209554 | (Tet)TetW:AJ222769:3687-5606:1920     |
| O2.UC19-0 | ERR209554 | (Bla)cfxA5:AY769934:28-993:966        |
| O2.UC19-0 | ERR209554 | (Tet)TetO:M18896:207-2126:1920        |
| O2.UC19-0 | ERR209554 | (MLS)ErmB:M11180:714-1451:738         |
| O2.UC19-0 | ERR209554 | (Tet)Tet-40:AM419751:14211-15431:1221 |
| O2.UC19-0 | ERR209554 | (Sul)Sull:AF071413:6700-7539:840      |
| O2.UC19-0 | ERR209554 | (Phe)CatP:U15027:2953-3576:624        |
| O2.UC22-0 | ERR209567 | (MLS)ErmG:M15332:672-1406:735         |
| O2.UC22-0 | ERR209567 | (Bla)cfxA5:AY769934:28-993:966        |
| O2.UC22-0 | ERR209567 | (Tet)TetW:AJ222769:3687-5606:1920     |
| O2.UC22-0 | ERR209567 | (MLS)ErmB:M11180:714-1451:738         |
| O2.UC22-0 | ERR209567 | (MLS)ErmF:M14730:241-1041:801         |
| O2.UC22-0 | ERR209567 | (Tet)TetO:M18896:207-2126:1920        |
| O2.UC22-0 | ERR209567 | (Tet)Tet-32:DQ647324:181-2100:1920    |
| O2.UC22-0 | ERR209567 | (Tet)TetX:M37699:586-1752:1167        |
| O2.UC23-0 | ERR209572 | (Tet)TetQ:Z21523:362-2287:1926        |
| O2.UC23-0 | ERR209572 | (Tet)TetW:AJ222769:3687-5606:1920     |
| O2.UC23-0 | ERR209572 | (AGly)Aph3-III:V01547:535-1329:795    |
| O2.UC23-0 | ERR209572 | (Tet)Tet-32:DQ647324:181-2100:1920    |
| O2.UC24-0 | ERR209576 | (Bla)cfxA6:GQ342996:798-1793:966      |
| O2.UC24-0 | ERR209576 | (Tet)TetW:AJ222769:3687-5606:1920     |
| O2.UC24-0 | ERR209576 | (Tet)TetX:M37699:586-1752:1167        |
| O2.UC24-0 | ERR209576 | (MLS)ErmF:M14730:241-1041:801         |
| O2.UC24-0 | ERR209576 | (MLS)ErmB:M11180:714-1451:738         |
| O2.UC24-0 | ERR209576 | (AGly)Aph3-III:V01547:535-1329:795    |
| O2.UC24-0 | ERR209576 | (Bla)cfxA5:AY769934:28-993:966        |
| O2.UC24-0 | ERR209576 | (Tet)TetO:M18896:207-2126:1920        |
| O2.UC24-0 | ERR209576 | (AGly)Sat4A:X92945:38870-39412:543    |
| O2.UC24-0 | ERR209576 | (Tet)Tet-32:DQ647324:181-2100:1920    |
| O2.UC24-0 | ERR209576 | (MLS)ErmG:M15332:672-1406:735         |
| V1.CD11-0 | ERR209682 | (MLS)LnuC:AY928180:1150-1644:495      |
| V1.CD11-0 | ERR209682 | (MLS)ErmF:M14730:241-1041:801         |
| V1.CD11-0 | ERR209682 | (Tet)TetX:M37699:586-1752:1167        |
| V1.CD11-0 | ERR209682 | (MLS)ErmG:M15332:672-1406:735         |
| V1.CD11-0 | ERR209682 | (Tet)TetQ:Z21523:362-2287:1926        |

|           |           |                                       |
|-----------|-----------|---------------------------------------|
| V1.CD11-0 | ERR209682 | (Bla)cfxA5:AY769934:28-993:966        |
| V1.CD11-0 | ERR209682 | (Tet)TetO:M18896:207-2126:1920        |
| V1.CD11-0 | ERR209682 | (MLS)ErmB:M11180:714-1451:738         |
| V1.CD12-0 | ERR209684 | (Bla)cfxA5:AY769934:28-993:966        |
| V1.CD12-0 | ERR209684 | (MLS)ErmF:M14730:241-1041:801         |
| V1.CD12-0 | ERR209684 | (Tet)TetQ:Z21523:362-2287:1926        |
| V1.CD12-0 | ERR209684 | (Tet)TetX:M37699:586-1752:1167        |
| V1.CD12-0 | ERR209684 | (AGly)Sat4A:X92945:38870-39412:543    |
| V1.CD12-0 | ERR209684 | (Tet)TetO:M18896:207-2126:1920        |
| V1.CD12-0 | ERR209684 | (AGly)Aph3-III:V01547:535-1329:795    |
| V1.CD12-0 | ERR209684 | (AGly)Ant6-Ia:AF330699:22-930:909     |
| V1.CD12-0 | ERR209684 | (MLS)ErmG:M15332:672-1406:735         |
| V1.CD12-0 | ERR209684 | (MLS)ErmB:M11180:714-1451:738         |
| V1.CD13-0 | ERR209686 | (Tet)TetW:AJ222769:3687-5606:1920     |
| V1.CD13-0 | ERR209686 | (AGly)Aph3-III:V01547:535-1329:795    |
| V1.CD13-0 | ERR209686 | (Bla)cfxA5:AY769934:28-993:966        |
| V1.CD13-0 | ERR209686 | (MLS)ErmG:M15332:672-1406:735         |
| V1.CD13-0 | ERR209686 | (Tet)TetO:M18896:207-2126:1920        |
| V1.CD13-0 | ERR209686 | (MLS)ErmB:M11180:714-1451:738         |
| V1.CD13-0 | ERR209686 | (AGly)Sat4A:X92945:38870-39412:543    |
| V1.CD13-0 | ERR209686 | (AGly)StrB:FJ474091:264-1100:837      |
| V1.CD13-0 | ERR209686 | (Sul)SulIII:EU360945:1617-2432:816    |
| V1.CD14-0 | ERR209688 | (Tet)TetW:AJ222769:3687-5606:1920     |
| V1.CD14-0 | ERR209688 | (MLS)LnuC:AY928180:1150-1644:495      |
| V1.CD14-0 | ERR209688 | (Bla)cfxA5:AY769934:28-993:966        |
| V1.CD14-0 | ERR209688 | (Tet)TetX:M37699:586-1752:1167        |
| V1.CD14-0 | ERR209688 | (MLS)ErmF:M14730:241-1041:801         |
| V1.CD14-0 | ERR209688 | (Tet)TetQ:Z21523:362-2287:1926        |
| V1.CD14-0 | ERR209688 | (Tet)TetO:M18896:207-2126:1920        |
| V1.CD14-0 | ERR209688 | (AGly)Aph3-III:V01547:535-1329:795    |
| V1.CD14-0 | ERR209688 | (MLS)ErmG:M15332:672-1406:735         |
| V1.CD14-0 | ERR209688 | (Tet)Tet-40:AM419751:14211-15431:1221 |
| V1.CD14-0 | ERR209688 | (AGly)Sat4A:X92945:38870-39412:543    |
| V1.CD14-0 | ERR209688 | (Tet)Tet-32:DQ647324:181-2100:1920    |
| V1.CD2-0  | ERR209704 | (Bla)cfxA5:AY769934:28-993:966        |
| V1.CD2-0  | ERR209704 | (Tet)TetW:AJ222769:3687-5606:1920     |
| V1.CD2-0  | ERR209704 | (Bla)cfxA6:GQ342996:798-1793:966      |
| V1.CD2-0  | ERR209704 | (Tet)TetO:M18896:207-2126:1920        |
| V1.CD2-0  | ERR209704 | (MLS)ErmB:M11180:714-1451:738         |
| V1.CD2-0  | ERR209704 | (AGly)Aph3-III:V01547:535-1329:795    |
| V1.CD3-0  | ERR209723 | (Tet)TetW:AJ222769:3687-5606:1920     |
| V1.CD3-0  | ERR209723 | (Bla)cfxA5:AY769934:28-993:966        |
| V1.CD3-0  | ERR209723 | (AGly)Aph3-III:V01547:535-1329:795    |
| V1.CD3-0  | ERR209723 | (Tet)TetO:M18896:207-2126:1920        |

|          |           |                                     |
|----------|-----------|-------------------------------------|
| V1.CD3-0 | ERR209723 | (MLS)ErmF:M14730:241-1041:801       |
| V1.CD3-0 | ERR209723 | (AGly)Sat4A:X92945:38870-39412:543  |
| V1.CD3-0 | ERR209723 | (Bla)OXA-347:JN086160:1583-2407:825 |
| V1.CD3-0 | ERR209723 | (Sul)SulII:EU360945:1617-2432:816   |
| V1.CD3-0 | ERR209723 | (MLS)ErmB:M11180:714-1451:738       |
| V1.CD6-0 | ERR209743 | (Bla)cfxA5:AY769934:28-993:966      |
| V1.CD6-0 | ERR209743 | (MLS)ErmF:M14730:241-1041:801       |
| V1.CD6-0 | ERR209743 | (Tet)TetX:M37699:586-1752:1167      |
| V1.CD6-0 | ERR209743 | (Tet)TetQ:Z21523:362-2287:1926      |
| V1.CD6-0 | ERR209743 | (Tet)TetW:AJ222769:3687-5606:1920   |
| V1.CD6-0 | ERR209743 | (MLS)LnuC:AY928180:1150-1644:495    |
| V1.CD6-0 | ERR209743 | (MLS)ErmG:M15332:672-1406:735       |
| V1.CD6-0 | ERR209743 | (MLS)ErmB:M11180:714-1451:738       |
| V1.CD6-0 | ERR209743 | (Tet)TetO:M18896:207-2126:1920      |
| V1.CD6-0 | ERR209743 | (AGly)Aph3-III:V01547:535-1329:795  |
| V1.CD6-0 | ERR209743 | (AGly)StrA:AB366441:22458-23261:804 |
| V1.CD6-0 | ERR209743 | (AGly)Sat4A:X92945:38870-39412:543  |
| V1.CD8-0 | ERR209750 | (Tet)TetW:AJ222769:3687-5606:1920   |
| V1.CD8-0 | ERR209750 | (MLS)LnuC:AY928180:1150-1644:495    |
| V1.CD8-0 | ERR209750 | (AGly)Sat4A:X92945:38870-39412:543  |
| V1.CD8-0 | ERR209750 | (AGly)Aph3-III:V01547:535-1329:795  |
| V1.CD8-0 | ERR209750 | (Tet)TetX:M37699:586-1752:1167      |
| V1.CD8-0 | ERR209750 | (MLS)ErmF:M14730:241-1041:801       |
| V1.CD8-0 | ERR209750 | (MLS)ErmB:M11180:714-1451:738       |
| V1.CD8-0 | ERR209750 | (Tet)TetO:M18896:207-2126:1920      |
| V1.CD8-0 | ERR209750 | (Tet)Tet-32:DQ647324:181-2100:1920  |
| V1.CD9-0 | ERR209752 | (Bla)cfxA5:AY769934:28-993:966      |
| V1.CD9-0 | ERR209752 | (Tet)TetW:AJ222769:3687-5606:1920   |
| V1.CD9-0 | ERR209752 | (MLS)ErmF:M14730:241-1041:801       |
| V1.CD9-0 | ERR209752 | (Tet)TetX:M37699:586-1752:1167      |
| V1.CD9-0 | ERR209752 | (AGly)Aph3-III:V01547:535-1329:795  |
| V1.CD9-0 | ERR209752 | (MLS)LnuC:AY928180:1150-1644:495    |
| V1.CD9-0 | ERR209752 | (MLS)ErmG:M15332:672-1406:735       |
| V1.CD9-0 | ERR209752 | (Tet)Tet-32:DQ647324:181-2100:1920  |
